# Supplementary material
Source: PubMed Central journal article supplement (PMC4119146)
Supplement: supp_131177_five-squissato-1-at.pdf [file supp_131177_five-squissato-1-at.pdf]

## Appendix 1: References

1. Jenkins PJ, Srikantharajah D, Duckworth AD, et al. Carpal tunnel syndrome: the association with occupation at a population level. *J Hand Surg Eur Vol* 2013;38:67-72.
2. Barcenilla A, March LM, Chen JS, et al. Carpal tunnel syndrome and its relationship to occupation: a meta-analysis. *Rheumatology* 2012;51:250-61.
3. Thomsen JF, Gerr F, Atroshi I. Carpal tunnel syndrome and the use of computer mouse and keyboard: a systematic review. *BMC Musculoskelet Disord* 2008;9:134.
4. Eleftheriou A, Rachiotis G, Varitimidis SE, et al. Cumulative keyboard strokes: a possible risk factor for carpal tunnel syndrome. *J Occup Med Toxicol* 2012;7:16.
5. Armstrong T, Dale AM, Franzblau A, et al. Risk factors for carpal tunnel syndrome and median neuropathy in a working population. *J Occup Environ Med* 2008;50:1355-64.
6. Hall B, Lee HC, Fitzgerald H, et al. Investigating the effectiveness of full-time wrist splinting and education in the treatment of carpal tunnel syndrome: a randomized controlled trial. *Am J Occup Ther* 2013;67:448-59.
